# Supplementary material
Source: PubMed Central journal article supplement (PMC1766385)
Supplement: rspb20063755s16.pdf [file rspb20063755s16.pdf]

Electronic Supplementary Information

**Tameness and stress physiology in a predator-naïve island species  
confronted with novel predation threat**

(Thomas Rödl <sup>&</sup>, Silke Berger <sup>§</sup>, L. Michael Romero <sup>‡</sup>, Martin Wikelski <sup>\*</sup>)

*\* Department of Ecology and Evolutionary Biology, Princeton University, Princeton, New Jersey 08544, USA*

*§ Department of Experimental Zoology, University of Ulm, 89069 Ulm, Germany*

*‡ Department of Biology, Tufts University, Medford, Massachusetts 02155, USA*

<sup>&</sup> email contact: Roedl@orn.mpg.de

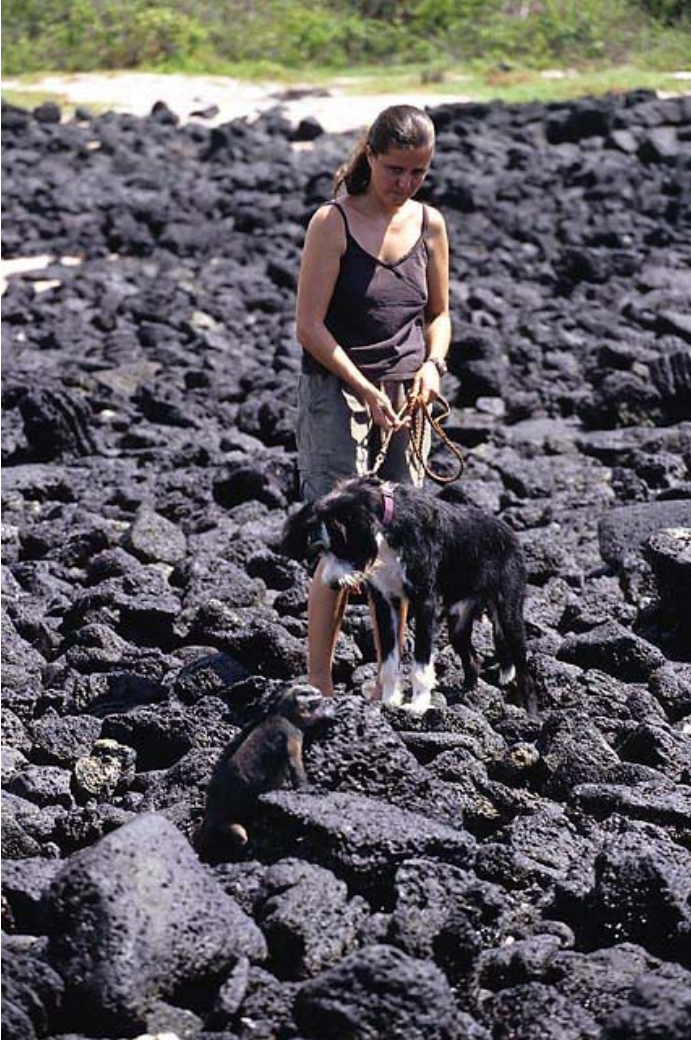**Supplementary Figure 1.**

Measuring flight initiation distances of marine iguanas with a trained dog.

This approach with a trained dog led by Shelley Thomas illustrates the narrow reaction norm in flight behaviour of marine iguanas. Although living next to the town of Puerto Ayora on St. Cruz Island, a site with introduced cats and dogs, flight initiation distances of the tested iguanas were short and obviously insufficient to avoid predation from a hunting dog. Photo: © TR.

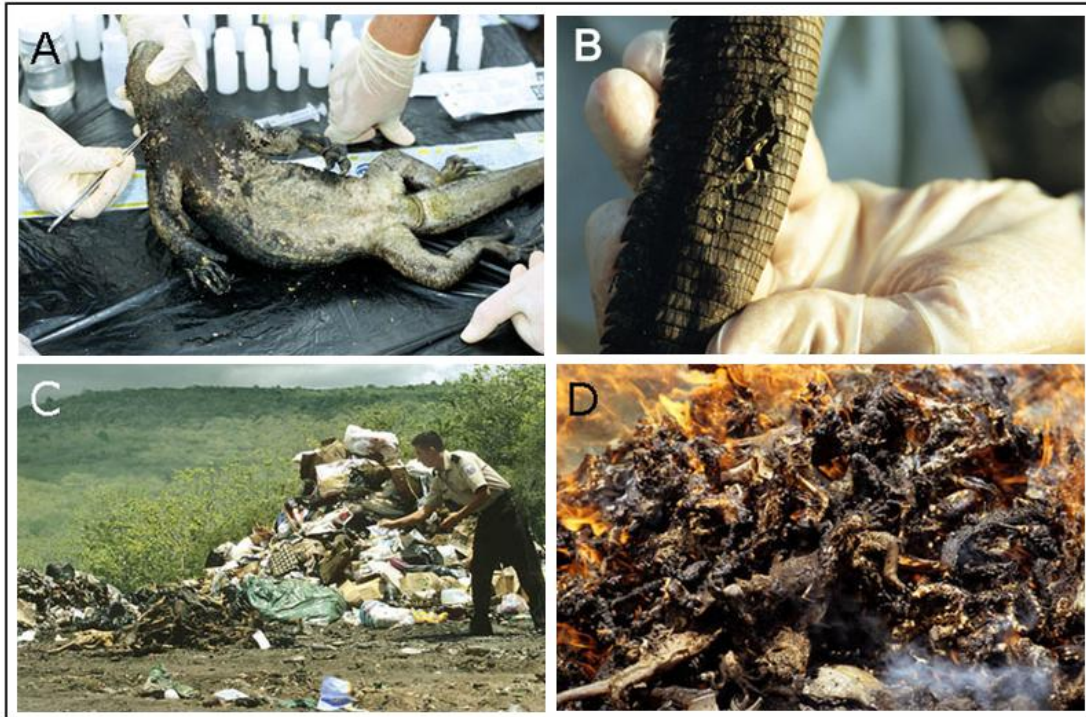

**Supplementary Figure 2.** Acute, heavy dog predation in a marine iguana colony on San Cristobal. In February 2005 the Galápagos National Park Service had recorded cumulative findings of marine iguana corpses next to the town Puerto Baquerizo Moreno. Closer investigation of the collected corpses and the autopsy of two adult males (A) revealed frequent bite marks and subsequent infections as the most likely cause of death in those individuals for which diagnosis was still possible\*. In many cases bite wounds were not lethal per se (B) but resulted in serious secondary infections and, as in the shown animal, in necrosis of about 2/3 of the tail. We assume that stray dogs from town, which do not depend on marine iguanas for food, caused death to the animals through invasive playful behaviour, which probably also provided unhurt marine iguanas the experience of dog encounters, priming their behavioural and endocrine responses to our experimental chasing. The extent of this case of acute local predation is illustrated by the number of 130 corpses, minimum, of different degree of decomposition that were found along a stretch of about 3km of coastline (S0°54'06', W89°37'17' to S0°55'08', W89°37'29') and incinerated by the National Park Service (C, D). Photos: © SB (A) and TR (B-D).

\* People and organizations involved in the survey: local office of the National Park Service, Virna Cedeño & Marilyn Cruz Bedón (Galápagos Genetics, Epidemiology and Pathology Laboratory), Gabriele Gentile (Tor Vergata University of Rome, Italy), Francesco Origgi (HSR Milan, Italy), Cruz Márquez & Gustavo Jiménez (Charles Darwin Research Station).
